# Supplementary material for: c-Myc Protein Level Affected by Unsymmetrical Bisacridines Influences Apoptosis and Senescence Induced in HCT116 Colorectal and H460 Lung Cancer Cells
Source: MDPI journal article supplement (doi:10.3390/ijms23063061), 2022-03-11
Supplement: s1 [file s1]

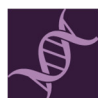

Supplementary Data

## c-Myc Protein Level Affected by Unsymmetrical Bisacridines Influences Apoptosis and Senescence Induced in HCT116 Colorectal and H460 Lung Cancer Cells

Monika Pawłowska, Jolanta Kulesza and Ewa Augustin \*

Department of Pharmaceutical Technology and Biochemistry, Faculty of Chemistry, Gdańsk University of Technology, 80-233 Gdańsk, Poland; monpawlo@pg.edu.pl (M.P.); jolanta.kulesza@pg.edu.pl (J.K.)

\* Correspondence: ewa.augustin@pg.edu.pl; Tel.: +48-58-347-14-68

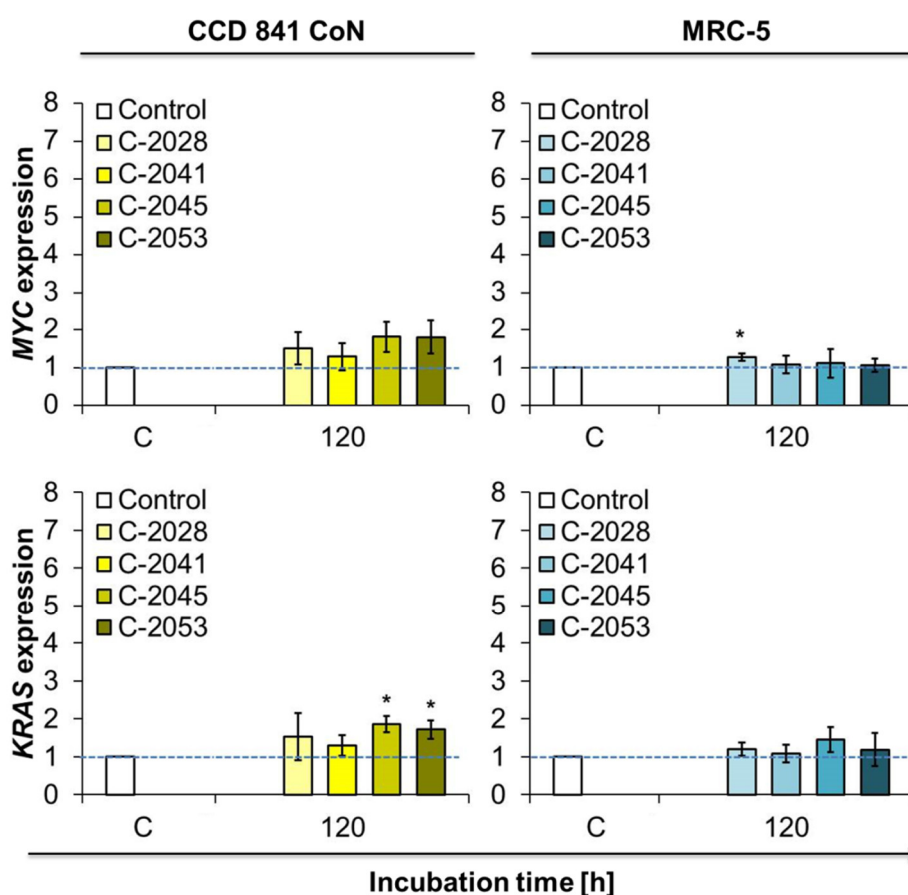

**Figure S1.** MYC and KRAS expression in CCD 841 CoN colon and MRC-5 lung normal cells. Cells were incubated with IC<sub>90</sub> doses of UAs for 120 h, total mRNA was isolated, transcribed to cDNA, and real-time PCR analysis was performed with the appropriate primers for the MYC and KRAS genes. ACTB (β-actin) was used as housekeeping gene standard. Relative gene expression was calculated using 2<sup>-ΔΔCt</sup> method [Livak]. Significantly different from the control at: \**p* < 0.05; \*\**p* < 0.01; \*\*\**p* < 0.001, *n* = 3).

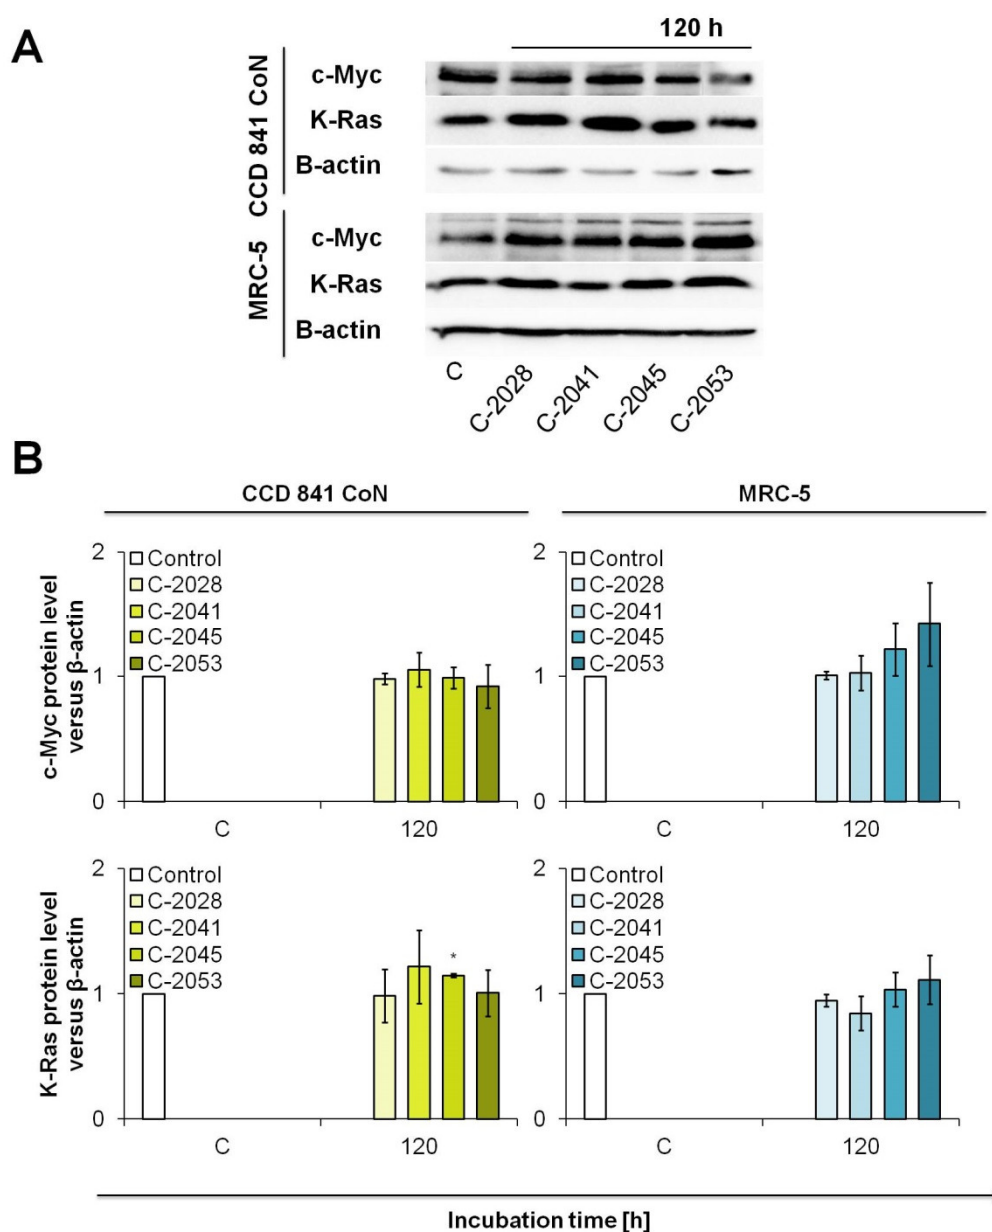

**Figure S2.** Western blot analysis of c-Myc and K-Ras protein levels in CCD841 CoN colon and MRC-5 lung normal cells. Cells were incubated with IC<sub>50</sub> doses of UAs for 120 h, whole cell extracts were prepared, 20 µg of proteins/lane were separated by polyacrylamide gel electrophoresis and semi-dry transferred on a membrane. Protein levels were detected after immunostaining the membrane with appropriate antibodies and ECL developing. **(A)** Representative Western blot analysis of c-Myc and K-Ras in CCD 841 CoN and MRC-5 cells and **(B)** their relative densitometry quantification performed using ImageJ Software. Significantly different from the control at: \* $p < 0.05$ ; \*\* $p < 0.01$ ; \*\*\* $p < 0.001$ ; (n = 3).

**Table S1.** Cell cycle distribution in UAs treated HCT116 cells. Flow cytometry analysis of cell cycle distribution of HCT116 untreated (control) and treated cells with C-2028, C-2041, C-2045 and C-2053 at concentrations corresponding to IC<sub>90</sub> doses for the times indicated. Data shows percentages of cells in the sub-G1, G1, S, G2/M, and Poli (polyploid cells) phases of the cell cycle. Data represents the averages of at least three independent experiments with standard deviation ( $n \geq 3$ ).

| Compound | Incubation Time [h] | Phase of Cell Cycle |              |              |              |              |
|----------|---------------------|---------------------|--------------|--------------|--------------|--------------|
|          |                     | Sub-G1              | G1           | S            | G2/M         | Poli         |
| Control  | 24                  | 2.03 ± 0.43         | 48.54 ± 2.58 | 16.72 ± 2.01 | 22.88 ± 2.27 | 9.98 ± 1.81  |
| C-2028   | 24                  | 3.37 ± 0.69         | 24.89 ± 3.90 | 19.33 ± 1.58 | 45.89 ± 3.13 | 5.73 ± 0.93  |
|          | 72                  | 36.97 ± 8.93        | 28.63 ± 5.96 | 7.67 ± 2.54  | 21.02 ± 4.86 | 5.11 ± 1.54  |
|          | 120                 | 37.46 ± 9.35        | 25.39 ± 3.25 | 4.95 ± 1.90  | 26.26 ± 4.90 | 5.73 ± 2.33  |
| C-2041   | 24                  | 11.81 ± 1.94        | 28.75 ± 3.88 | 25.97 ± 2.80 | 29.92 ± 4.56 | 4.22 ± 2.00  |
|          | 72                  | 48.83 ± 7.71        | 22.16 ± 5.06 | 9.59 ± 2.24  | 14.29 ± 1.52 | 4.47 ± 2.13  |
|          | 120                 | 68.86 ± 9.48        | 13.63 ± 3.71 | 3.25 ± 1.05  | 9.44 ± 3.88  | 4.64 ± 2.56  |
| C-2045   | 24                  | 3.90 ± 0.83         | 24.61 ± 2.63 | 16.33 ± 1.34 | 50.18 ± 2.39 | 4.91 ± 2.33  |
|          | 72                  | 17.38 ± 4.00        | 28.51 ± 4.31 | 6.15 ± 0.70  | 34.06 ± 3.35 | 12.20 ± 1.85 |
|          | 120                 | 35.40 ± 5.84        | 22.11 ± 2.54 | 4.56 ± 1.19  | 22.94 ± 2.48 | 15.17 ± 3.74 |
| C-2053   | 24                  | 3.06 ± 1.09         | 22.34 ± 2.79 | 19.19 ± 1.77 | 44.81 ± 7.10 | 8.89 ± 1.38  |
|          | 72                  | 10.45 ± 2.56        | 35.18 ± 2.63 | 5.43 ± 1.59  | 36.32 ± 3.14 | 11.02 ± 2.20 |
|          | 120                 | 23.64 ± 4.86        | 30.06 ± 4.35 | 4.10 ± 0.56  | 27.20 ± 4.16 | 14.62 ± 4.62 |

**Table S2.** Cell cycle distribution in UAs treated H460 cells Flow cytometry analysis of cell cycle distribution of H460 untreated (control) and treated cells with C-2028, C-2041, C-2045 and C-2053 at concentrations corresponding to IC<sub>90</sub> doses for the times indicated. Data shows percentages of cells in the sub-G1, G1, S, G2/M, and Poli (polyploid cells) phases of the cell cycle. Data represents the averages of at least three independent experiments with standard deviation ( $n \geq 3$ ).

| Compound | Incubation Time [h] | Phase of Cell Cycle |              |              |              |             |
|----------|---------------------|---------------------|--------------|--------------|--------------|-------------|
|          |                     | Sub-G1              | G1           | S            | G2/M         | Poli        |
| Control  | 24                  | 2.39 ± 0.73         | 60.09 ± 1.73 | 16.46 ± 0.55 | 18.37 ± 1.08 | 2.66 ± 0.64 |
| C-2028   | 24                  | 11.09 ± 3.80        | 32.92 ± 3.77 | 32.74 ± 2.09 | 21.64 ± 4.23 | 1.70 ± 0.42 |
|          | 72                  | 25.45 ± 7.20        | 37.15 ± 4.13 | 15.80 ± 2.33 | 19.21 ± 6.60 | 2.11 ± 0.55 |
|          | 120                 | 26.84 ± 1.92        | 29.87 ± 2.31 | 9.93 ± 2.46  | 28.98 ± 3.64 | 4.03 ± 0.95 |
| C-2041   | 24                  | 8.43 ± 3.14         | 31.30 ± 2.48 | 34.76 ± 4.78 | 23.89 ± 5.34 | 1.78 ± 0.42 |
|          | 72                  | 17.43 ± 2.40        | 42.86 ± 1.87 | 16.09 ± 2.94 | 21.24 ± 2.69 | 2.52 ± 0.71 |
|          | 120                 | 36.47 ± 3.18        | 35.08 ± 3.65 | 11.59 ± 1.16 | 14.84 ± 4.06 | 2.30 ± 0.60 |
| C-2045   | 24                  | 9.84 ± 4.46         | 32.25 ± 3.01 | 26.56 ± 3.44 | 28.15 ± 2.14 | 1.78 ± 0.33 |
|          | 72                  | 18.66 ± 3.61        | 39.94 ± 4.65 | 18.53 ± 5.99 | 20.87 ± 5.18 | 2.05 ± 0.60 |
|          | 120                 | 42.42 ± 8.29        | 23.89 ± 3.28 | 9.03 ± 1.37  | 21.49 ± 5.96 | 2.28 ± 1.33 |
| C-2053   | 24                  | 6.28 ± 1.52         | 30.44 ± 2.27 | 33.77 ± 3.66 | 27.37 ± 2.20 | 2.76 ± 0.30 |
|          | 72                  | 22.37 ± 2.06        | 36.08 ± 5.84 | 14.09 ± 2.46 | 24.96 ± 3.05 | 1.73 ± 0.52 |
|          | 120                 | 41.51 ± 5.77        | 25.01 ± 3.97 | 10.78 ± 1.76 | 19.77 ± 6.06 | 2.39 ± 1.17 |
